# Supplementary material for: Constructing bis(porphyrinato) rare earth double-decker complexes involving N-confused porphyrin
Source: Royal Society of Chemistry journal article supplement (doi:10.1039/c4dt00216d), 2014-01-01
Supplement: c4dt00216d1.pdf [file c4dt00216d1.pdf]

## **Supporting Information**

**Constructing Bis(porphyrinato) Rare Earth Double-Decker Complexes**

**Involving N-Confused Porphyrin**

**Yuehong Zhang,<sup>†</sup> Wei Cao,<sup>†</sup> Kang Wang,<sup>†\*</sup> and Jianzhuang Jiang<sup>†\*</sup>**

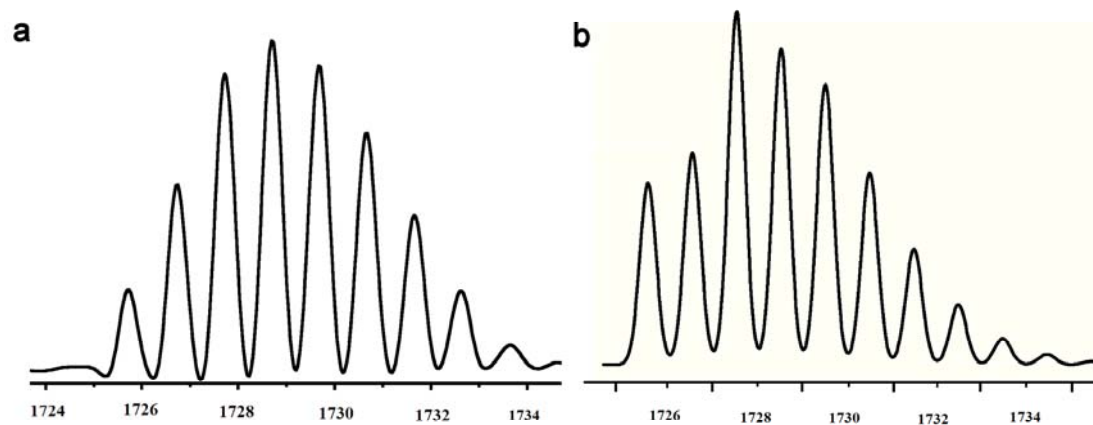

**Fig. S1.** Experimental (a) and simulated isotopic (b) pattern for the protonated molecular ion of  $\text{La}^{\text{III}}(\text{HNTCIPP})(\text{TBPP})$  (**1**).

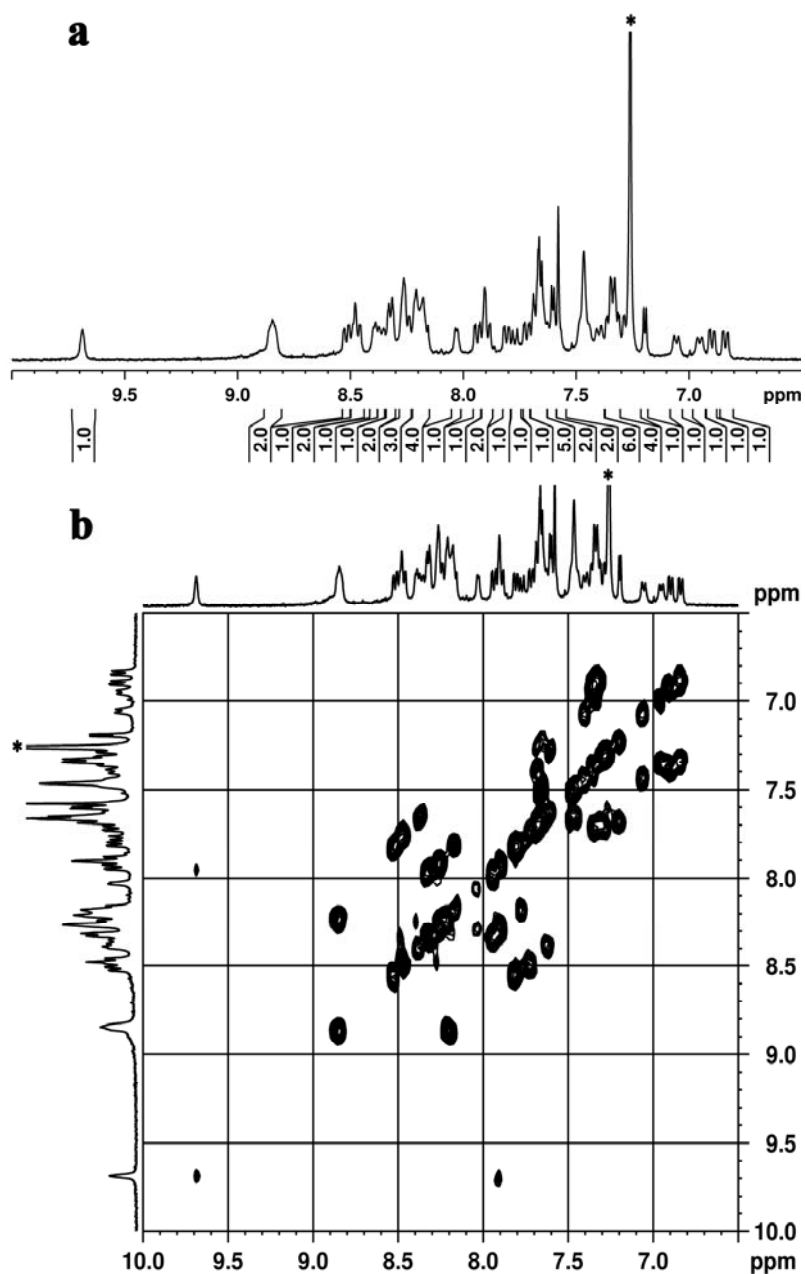

**Fig. S2.** (a)  $^1\text{H}$  NMR and (b)  $^1\text{H}$ - $^1\text{H}$  COSY spectra of  $\text{La}^{\text{III}}(\text{HNTCIPP})(\text{TBPP})$  (**1**) in  $\text{CDCl}_3$  in the region from  $\delta$  6.5-10.0 ppm at 263K. \* indicates the signals of residual solvent.

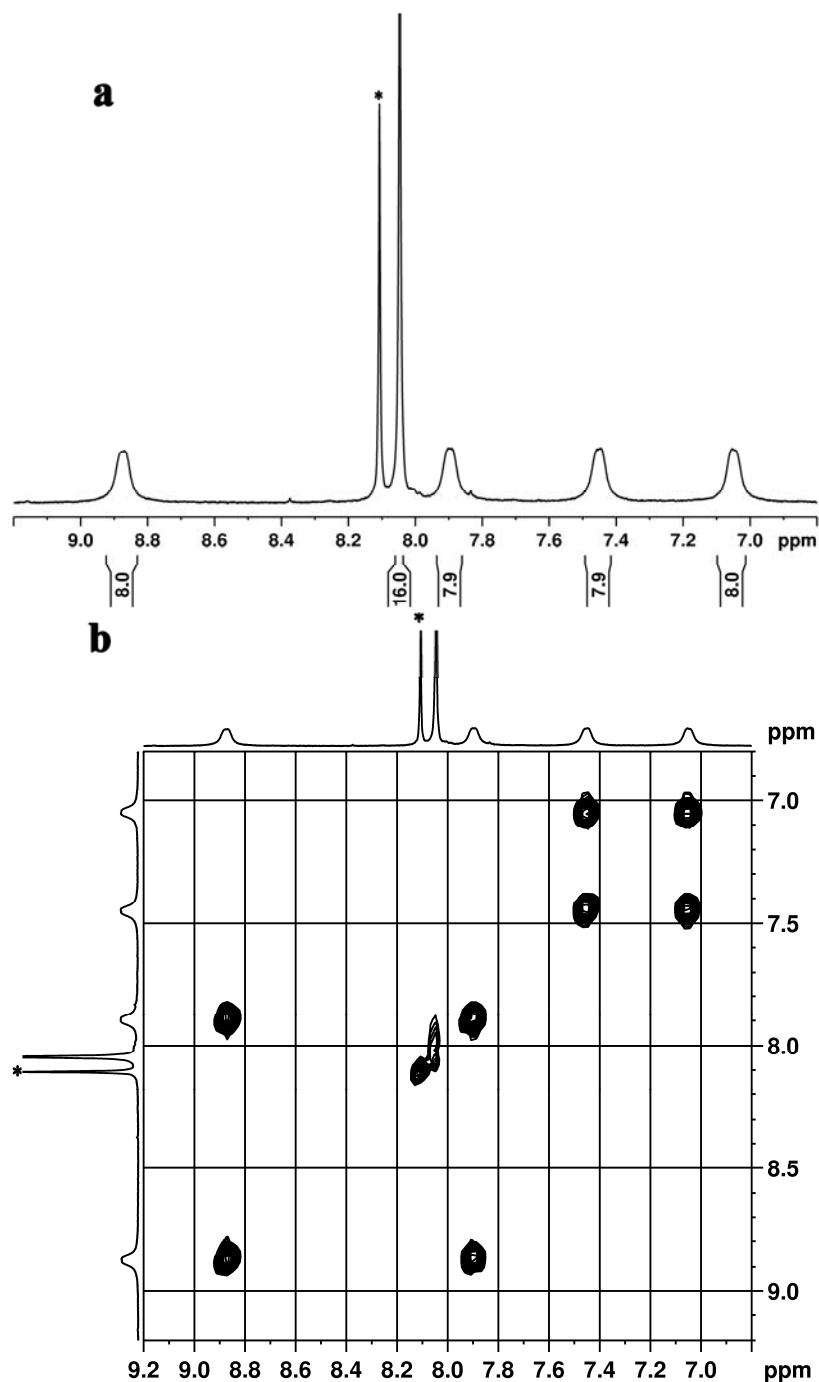

**Fig. S3.** (a)  $^1\text{H}$  NMR and (b)  $^1\text{H}$ - $^1\text{H}$  COSY spectra of  $\text{HLa}^{\text{III}}(\text{TBPP})_2$  (**3**) in  $\text{CDCl}_3/[\text{D}_6]\text{DMSO}$  (1:1) in the presence of approximately 1% hydrazine hydrate in the region from  $\delta$  6.8-9.2 ppm at 298K. \* indicates the signals of residual solvent.

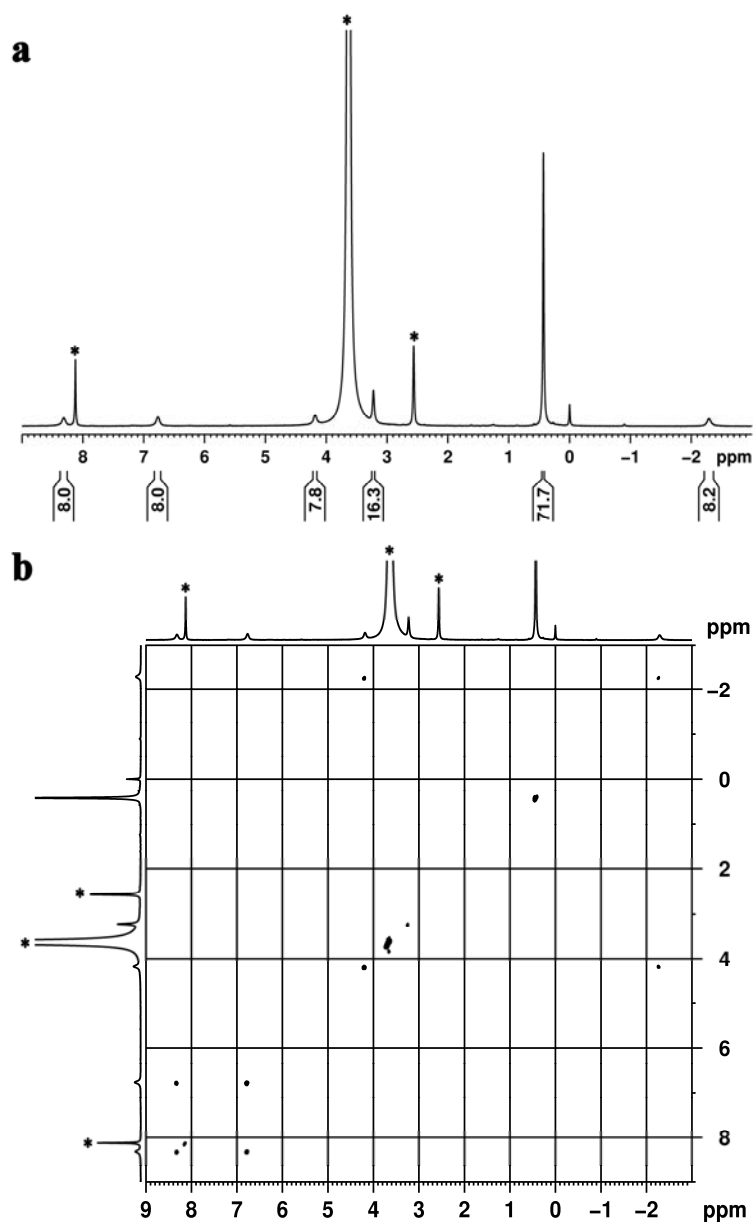

**Fig. S4.** (a)  $^1\text{H}$  NMR and (b)  $^1\text{H}$ - $^1\text{H}$  COSY spectra of  $\text{HPr}^{\text{III}}(\text{TBPP})_2$  (**4**) in  $\text{CDCl}_3/[\text{D}_6]\text{DMSO}$  (1:1) in the presence of approximately 1% hydrazine hydrate in the region from  $\delta$  -3.0-9.0 ppm at 298K. \* indicates the signals of residual solvents and water.

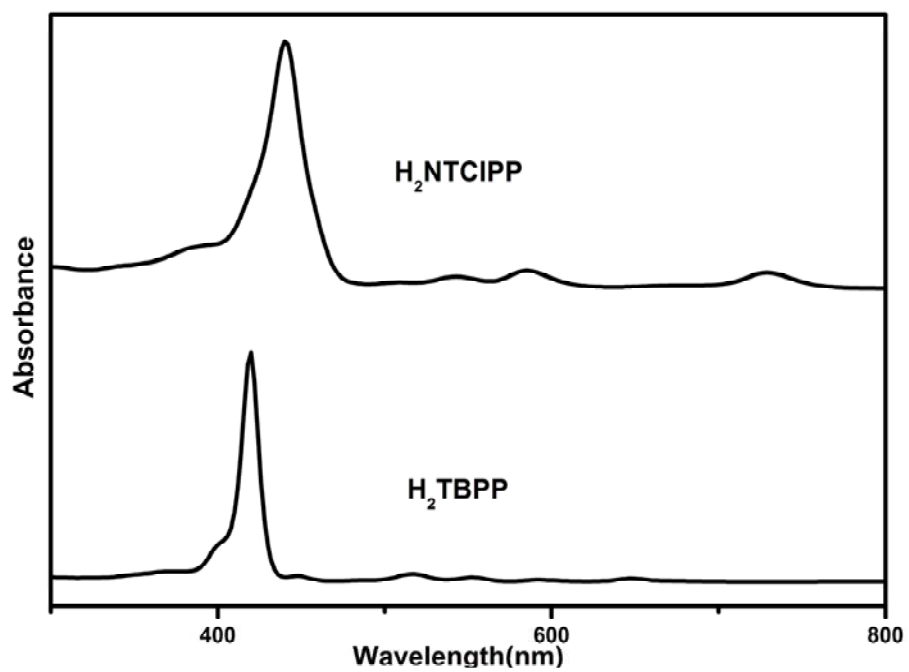

**Fig. S5.** Electronic absorption spectra of H<sub>2</sub>NTCIPP and H<sub>2</sub>TBPP.

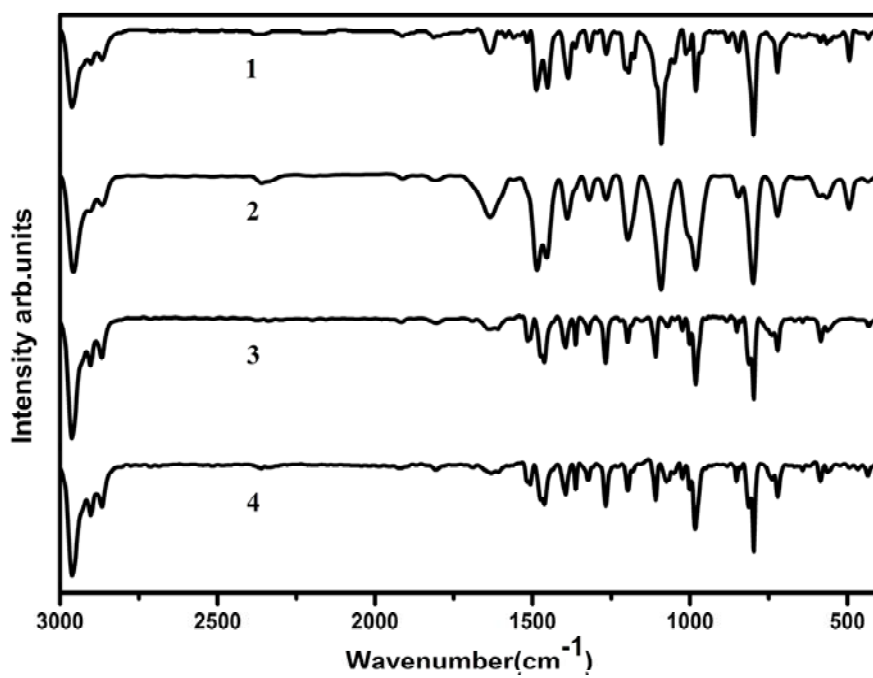

**Fig. S6.** IR spectra of **1-4** in the region of 400-3000  $\text{cm}^{-1}$ .

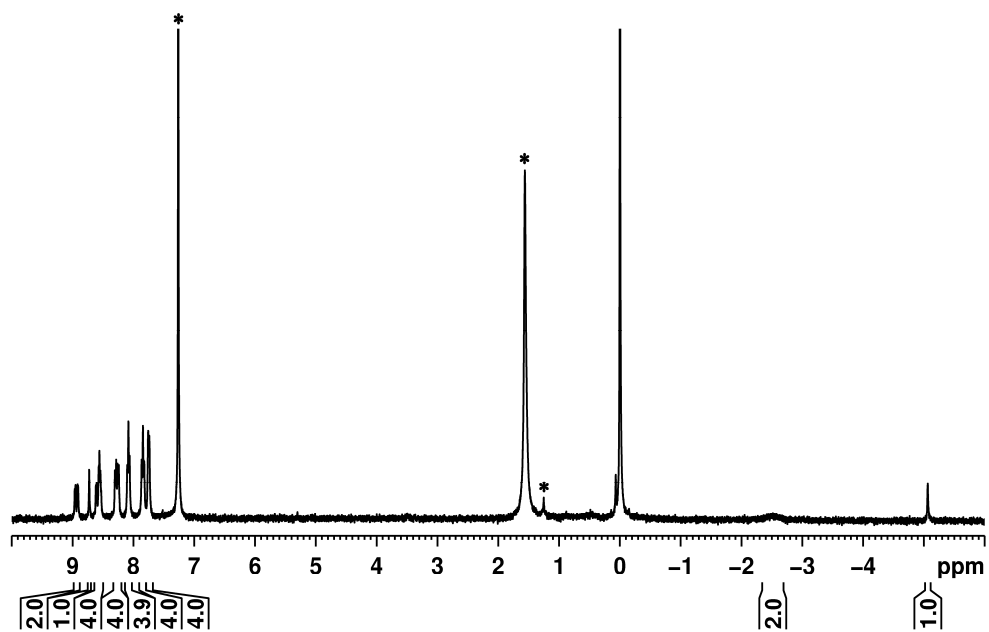

**Fig. S7.** <sup>1</sup>H NMR spectra of H<sub>2</sub>NTCIPP in CDCl<sub>3</sub>. \* indicates the signals for residue solvent and impurities.



**Table S1.**  $^1\text{H}$  NMR data ( $\delta$ ) for the heteroleptic double-decker **1** in  $\text{CDCl}_3$  at 263K.

| Compound | $\text{H}_a^{[a]}$ | $\text{H}_b^{[a]}$ | $\text{H}_c^{[a]}$ | $\text{H}_\beta$                                                                                                                                                                                                                                                                       | $\text{H}_{\text{aryl}}$                                                                                                                                                                                                                                                                                                                                                                 | $\text{H}_{\text{t-butyl}}$   |
|----------|--------------------|--------------------|--------------------|----------------------------------------------------------------------------------------------------------------------------------------------------------------------------------------------------------------------------------------------------------------------------------------|------------------------------------------------------------------------------------------------------------------------------------------------------------------------------------------------------------------------------------------------------------------------------------------------------------------------------------------------------------------------------------------|-------------------------------|
| <b>1</b> | 9.69(s, 1 H)       | 7.94(d, 1 H)       | -4.18 (s, 1 H)     | 8.84 (br s, 2H) <sup>[b]</sup> , 8.40 - 8.32 (m, 4H) <sup>[b]</sup> , 8.26 - 8.16 (m, 7 H) <sup>[b]</sup> , 7.90 - 7.88 (m, 2 H) <sup>[b]</sup> , 7.77 (d, 1 H), 7.69 - 7.65 (m, 6H) <sup>[b]</sup> , 7.60 (d, 1 H), 7.58 (s, 2 H), 7.35 - 7.29 (m, 4H) <sup>[b]</sup> , 7.20 (d, 1 H) | 8.84 (br s, 2H) <sup>[b]</sup> , 8.53 - 8.46(m, 3H), 8.40 - 8.32 (m, 4H) <sup>[b]</sup> , 8.26 - 8.16 (m, 7 H) <sup>[b]</sup> , 8.03 (d, 1 H), 7.90 - 7.88 (m, 2 H) <sup>[b]</sup> , 7.81 (d, 1 H), 7.72 (d, 1 H), 7.69 - 7.65 (m, 6H) <sup>[b]</sup> , 7.47 - 7.36 (m, 6H) <sup>[b]</sup> , 7.35 - 7.29 (m, 4H) <sup>[b]</sup> , 7.06 (d, 1H), 6.95 (d, 1H), 6.90 (d, 1H), 6.84 (d, 1H) | 1.77 (s, 18 H), 1.53 (s, 18H) |

[a]  $\text{H}_a$  and  $\text{H}_b$  stand for the NH proton and CH proton, respectively, on the inverted pyrrole, while  $\text{H}_c$  stands for the proton attached to C(21) in HNTCIPP ligand. [b] Some of the  $\text{H}_\beta$  and  $\text{H}_{\text{aryl}}$  protons' signals were partially overlapped.

---

**Table S2.**  $^1\text{H}$  NMR data for the homoleptic double-deckers **3** and **4** in  $\text{CDCl}_3/[\text{D}_6]\text{DMSO}$  (1:1) in the presence of approximately 1% hydrazine hydrate at 298 K.

| Compound | $\text{H}_{\text{aryl}}$                                   | $\text{H}_{\beta}$ | $\text{H}_{\text{t-butyl}}$ |
|----------|------------------------------------------------------------|--------------------|-----------------------------|
| <b>3</b> | 8.87 (s, 8H), 7.90 (s, 8H),<br>7.45 (s, 8H), 7.05 (s, 8H)  | 8.05 (s, 16H)      | 1.67 (s, 72H)               |
| <b>4</b> | 8.32 (s, 8H), 6.76 (s, 8H),<br>4.18 (s, 8H), -2.29 (s, 8H) | 3.22 (s, 16H)      | 0.43 (s, 72H)               |

**Table S3.** Electronic absorption data for the double-deckers **1-4** in CHCl<sub>3</sub>.

| Compound | $\lambda_{\text{max}}/\text{nm}$ ( $\log \epsilon$ ) |           |            |            |            |
|----------|------------------------------------------------------|-----------|------------|------------|------------|
| <b>1</b> | 320(4.69)                                            | 356(4.68) | 420 (5.49) | 574 (3.99) | 846 (4.00) |
| <b>2</b> | 325(4.57)                                            | 358(4.60) | 420 (5.44) | 562 (3.89) | 849 (3.80) |
| <b>3</b> | --                                                   | --        | 416 (5.63) | 559 (4.05) | --         |
| <b>4</b> | --                                                   | --        | 415 (5.56) | 556 (4.04) | --         |

**Table S4.** Crystallographic data for the heteroleptic double-decker **2**.

| <b>2</b>                                            |                                                                    |
|-----------------------------------------------------|--------------------------------------------------------------------|
| Molecular formula                                   | C <sub>104</sub> H <sub>85</sub> Cl <sub>4</sub> N <sub>8</sub> Pr |
| <i>M</i>                                            | 1729.51                                                            |
| Crystal system                                      | Monoclinic                                                         |
| Space group                                         | <i>P</i> 21/ <i>n</i>                                              |
| <i>a</i> /Å                                         | 21.9573(8)                                                         |
| <i>b</i> /Å                                         | 31.7949(7)                                                         |
| <i>c</i> /Å                                         | 32.7974(13)                                                        |
| $\alpha$ <sup>o</sup>                               | 90                                                                 |
| $\beta$ <sup>o</sup>                                | 108.506(4)                                                         |
| $\gamma$ <sup>o</sup>                               | 90                                                                 |
| <i>U</i> /Å <sup>3</sup>                            | 21712.9(13)                                                        |
| <i>Z</i>                                            | 8                                                                  |
| <i>D</i> <sub>c</sub> /Mg m <sup>-3</sup>           | 1.058                                                              |
| $\mu$ /mm <sup>-1</sup>                             | 4.677                                                              |
| Data collection range <sup>o</sup>                  | 3.12 to 62.50                                                      |
| Reflections measured                                | 61304                                                              |
| Independent reflections                             | 34233 ( <i>R</i> <sub>int</sub> = 0.0872)                          |
| Parameters                                          | 1915                                                               |
| <i>R</i> <sub>1</sub> [ <i>I</i> > 2σ( <i>I</i> )]  | 0.0755                                                             |
| <i>wR</i> <sub>2</sub> [ <i>I</i> > 2σ( <i>I</i> )] | 0.1627                                                             |
| Goodness of fit                                     | 0.987                                                              |
